# Supplementary material
Source: MDPI journal article supplement (https://www.mdpi.com/2073-4441/13/13/1823)
Supplement: s1 [file s1]

# Risk Assessment of Water Resources-Energy Security Based on Cloud Model: A Case Study of China in 2020

Yafeng Yang <sup>1,2</sup>, Hongrui Wang <sup>1,\*</sup>, Yuanyuan Zhang <sup>1</sup> and Cheng Wang <sup>3,4</sup>

<sup>1</sup> Beijing Key Laboratory of Urban Hydrological Cycle and Sponge City Technology, College of Water Sciences, Beijing Normal University, Beijing 100875, China; henrywang@bnu.edu.cn (H.W.), camel-lia@mail.bnu.edu.cn (Y.Z.)

<sup>2</sup> College of Sciences, North China University of Science and Technology, Tangshan 063210, China; hblgyf@ncst.edu.cn (Y.Y.)

<sup>3</sup> Environment Science Division, Argonne National Laboratory, Lemont, IL 60439, USA; wangcheng@anl.gov (C.W.)

<sup>4</sup> Consortium for Advanced Science and Engineering, University of Chicago, Chicago, IL 60637, USA

\* Correspondence: henrywang@bnu.edu.cn; Tel: 86-1-58807941

**Table S1.** Information flow value of risk factors and water shortage risk.

| Criterion Layer             | Indicator Layer                                                         | Information Flow |
|-----------------------------|-------------------------------------------------------------------------|------------------|
| Water resources endowment   | Water production modulus ( $10^4 \text{ m}^3/\text{km}^2$ )             | 0.0069           |
|                             | Precipitation (mm)                                                      | 0.1596           |
|                             | Water resources per capita ( $\text{m}^3$ )                             | 0.1068           |
|                             | Surface water resources amount ( $10^8 \text{ m}^3$ )                   | 0.1658           |
|                             | Groundwater resources amount ( $10^8 \text{ m}^3$ )                     | 0.1656           |
|                             | Incoming water volume ( $10^8 \text{ m}^3$ )                            | 0.0915           |
|                             | GDP ( $10^8 \text{ yuan}$ )                                             | 0.0003           |
| Social economy              | GDP Per capita (yuan)                                                   | 0.0035           |
|                             | Proportion of primary industry (%)                                      | 0.0789           |
|                             | Proportion of secondary industry (%)                                    | 0.0321           |
|                             | Proportion of tertiary industry (%)                                     | 0.0389           |
|                             | Water consumption Per 10,000-yuan GDP ( $\text{m}^3$ )                  | 0.3341           |
|                             | Population density ( $\text{per}/\text{km}^2$ )                         | 0.005            |
|                             | Natural growth rate of population (%)                                   | 0.0971           |
| Water resources utilization | Urbanization rate (%)                                                   | 0.0367           |
|                             | Water supply per capita ( $\text{m}^3$ )                                | 0.162            |
|                             | Industrial water consumption ( $10^8 \text{ m}^3$ )                     | 0.0236           |
|                             | Agricultural water consumption ( $10^8 \text{ m}^3$ )                   | 0.0159           |
|                             | Domestic water consumption ( $10^8 \text{ m}^3$ )                       | 0.0268           |
|                             | Effective utilization coefficient of agricultural land irrigation water | 0.0072           |
|                             | Percentage of forest cover (%)                                          | 0.069            |
| Water environment           | Water consumption of ecological environment ( $10^8 \text{ m}^3$ )      | 0.0856           |
|                             | discharge of wastewater ( $10^4 \times \text{m}^3$ )                    | 0.0781           |
|                             | Wastewater treatment rate (%)                                           | 0.0141           |

**Table S2.** Information flow value of risk factors and energy security risks.

| Criterion Layer  | Indicator Layer                                  | Information Flow |
|------------------|--------------------------------------------------|------------------|
| Energy endowment | Elasticity coefficient of energy production      | 0.0012           |
|                  | Energy reserve ratio                             | 0.1271           |
|                  | elasticity coefficient of electricity production | 0.0022           |
|                  | Power generation                                 | 0.0282           |

|                                                                            |                                                            |        |
|----------------------------------------------------------------------------|------------------------------------------------------------|--------|
| Social economy                                                             | Energy production per Capita (kg ce / per)                 | 0.0564 |
|                                                                            | Energy import (10,000 tce)                                 | 0.1368 |
|                                                                            | Inventory increase and decrease (10 <sup>4</sup> tcel)     | 0.0553 |
|                                                                            | Degree of external dependence                              | 0.1803 |
|                                                                            | GDP (100 million yuan)                                     | 0.0487 |
|                                                                            | GDP Per capita (yuan)                                      | 0.0496 |
|                                                                            | Proportion of primary industry                             | 0.1695 |
|                                                                            | Proportion of secondary industry                           | 0.3689 |
|                                                                            | Proportion of tertiary industry                            | 0.1299 |
|                                                                            | Energy consumption per 10000-yuan GDP (tcel)               | 0.2026 |
| Energy utilization                                                         | Population density (10 <sup>4</sup> people)                | 0.3412 |
|                                                                            | Natural population growth rate                             | 0.0008 |
|                                                                            | Urbanization rate (%)                                      | 0.1889 |
|                                                                            | Elasticity coefficient of energy consumption               | 0.0012 |
|                                                                            | Elasticity coefficient of electricity consumption          | 0.0030 |
| Atmospheric environment                                                    | Energy consumption per capita (kg ce)                      | 0.0561 |
|                                                                            | Domestic energy per capita (kg ce)                         | 0.0536 |
|                                                                            | Traffic route length (10 <sup>4</sup> km)                  | 0.0268 |
|                                                                            | Vehicle ownership (10 <sup>4</sup> )                       | 0.1693 |
|                                                                            | Conversion efficiency of energy processing                 | 0.0093 |
|                                                                            | SO <sub>2</sub> emission reduction rate (%)                | 0.0009 |
|                                                                            | CO <sub>2</sub> emission per capita (10 <sup>4</sup> tons) | 0.0107 |
|                                                                            | Emission of smoke (powder) dust (10 <sup>4</sup> tons)     | 0.0264 |
| Total investment in environmental pollution control (10 <sup>8</sup> yuan) |                                                            | 0.0830 |

Table S3. Ranking results based on expert opinions.

|          | Precipitation | Precipitation Coefficient | Water Supply Per Capita | GDP Water Consumption Per 10,000 Yuan |
|----------|---------------|---------------------------|-------------------------|---------------------------------------|
| Expert 1 | 1             | 2                         | 3                       | 4                                     |
| Expert 2 | 2             | 1                         | 3                       | 4                                     |
| Expert 3 | 1             | 3                         | 2                       | 4                                     |
| Expert 4 | 2             | 1                         | 3                       | 4                                     |
| Expert 5 | 3             | 2                         | 1                       | 4                                     |

Table S4. Calculation table of structure entropy weight of energy security risk assessment Indicator.

|          | Proportion Of Secondary Industry | Population Density | Energy Reserve Ratio | Energy Consumption Per 10,000 Yuan GDP |
|----------|----------------------------------|--------------------|----------------------|----------------------------------------|
| Expert 1 | 2                                | 3                  | 1                    | 4                                      |
| Expert 2 | 3                                | 2                  | 1                    | 4                                      |
| Expert 3 | 2                                | 4                  | 1                    | 3                                      |
| Expert 4 | 2                                | 3                  | 1                    | 4                                      |
| Expert 5 | 1                                | 3                  | 2                    | 4                                      |
| $b_j$    | 0.85                             | 0.67               | 0.97                 | 0.48                                   |
| $Q_j$    | 0.02                             | 0.05               | 0.08                 | 0.15                                   |
| $x_j$    | 0.83                             | 0.64               | 0.89                 | 0.41                                   |
| W        | 0.300                            | 0.231              | 0.321                | 0.148                                  |

Table S5. Assessment results of risk degree of water resources shortage with different guarantee rates.

| P = 25% |       |       |       |       | Result | P = 50% |       |       |       |       | Result |
|---------|-------|-------|-------|-------|--------|---------|-------|-------|-------|-------|--------|
| U (1)   | U (2) | U (3) | U (4) | U (5) |        | U (1)   | U (2) | U (3) | U (4) | U (5) |        |

|               |        |        |        |        |        |     |        |        |        |        |        |     |
|---------------|--------|--------|--------|--------|--------|-----|--------|--------|--------|--------|--------|-----|
| Beijing       | 0.0921 | 0.0256 | 0.2871 | 0.3902 | 0.1032 | IV  | 0.0921 | 0.0196 | 0.1924 | 0.4287 | 0.1595 | IV  |
| Tianjin       | 0.1012 | 0.0166 | 0.2842 | 0.3032 | 0.1598 | IV  | 0.1012 | 0.0166 | 0.1362 | 0.3269 | 0.1894 | IV  |
| Shanghai      | 0.2593 | 0.1087 | 0.2006 | 0.1063 | 0      | I   | 0.2168 | 0.1087 | 0.2006 | 0.1537 | 0      | I   |
| Chongqing     | 0.3570 | 0.0982 | 0.0002 | 0.2502 | 0.0051 | I   | 0.3067 | 0.1011 | 0.0002 | 0.2523 | 0.0051 | I   |
| Hebei         | 0      | 0.1178 | 0.1763 | 0.3506 | 0.2167 | IV  | 0      | 0.1178 | 0.0756 | 0.4335 | 0.2463 | IV  |
| Shanxi        | 0      | 0.0544 | 0.1603 | 0.3844 | 0.2015 | IV  | 0      | 0.0544 | 0.0508 | 0.4909 | 0.2134 | IV  |
| Liaoning      | 0.0059 | 0.3800 | 0.3101 | 0.5445 | 0.0077 | IV  | 0      | 0.1639 | 0.3397 | 0.5534 | 0.0166 | IV  |
| Jilin         | 0.0030 | 0.1526 | 0.7724 | 0.3448 | 0.0089 | III | 0.0012 | 0.1022 | 0.7428 | 0.4188 | 0.0012 | III |
| Hei-longjiang | 0.1109 | 0.1273 | 0.3641 | 0.5074 | 0.0030 | IV  | 0.1085 | 0.0651 | 0.2427 | 0.6139 | 0.0089 | IV  |
| Jiangsu       | 0.0525 | 0.3122 | 0.0362 | 0.1924 | 0      | II  | 0.0229 | 0.4365 | 0.1842 | 0.2664 | 0      | II  |
| Zhejiang      | 0.6011 | 0.1238 | 0.0030 | 0.2570 | 0.0026 | I   | 0.5803 | 0.1238 | 0.0030 | 0.2582 | 0.0026 | I   |
| Anhui         | 0.1569 | 0.0212 | 0.3297 | 0.0469 | 0      | III | 0.0740 | 0.0212 | 0.3297 | 0.1179 | 0      | III |
| Fujian        | 0.5890 | 0.1087 | 0.1735 | 0.1002 | 0      | I   | 0.5535 | 0.1087 | 0.1735 | 0.1020 | 0      | I   |
| Jiangxi       | 0.5890 | 0.0771 | 0.2032 | 0.0056 | 0      | I   | 0.5328 | 0.0771 | 0.2032 | 0.0074 | 0      | I   |
| Shandong      | 0.0272 | 0.1806 | 0.0918 | 0.4234 | 0.0490 | IV  | 0.0272 | 0.0918 | 0.2546 | 0.3731 | 0.0845 | IV  |
| Henan         | 0.0047 | 0.4172 | 0.0297 | 0.5103 | 0.0221 | IV  | 0      | 0.2129 | 0.1273 | 0.4215 | 0.0458 | IV  |
| Hubei         | 0.2013 | 0.0415 | 0.2607 | 0.0332 | 0      | III | 0.1302 | 0.0445 | 0.2607 | 0.0657 | 0      | III |
| Hunan         | 0.5417 | 0.0056 | 0.3492 | 0.0574 | 0      | I   | 0.4410 | 0.0056 | 0.3492 | 0.0589 | 0      | I   |
| Guangdong     | 0.5846 | 0.1465 | 0.0339 | 0.2119 | 0.0003 | I   | 0.5787 | 0.1465 | 0.0339 | 0.2128 | 0.0003 | I   |
| Hainan        | 0.5831 | 0.0020 | 0.3545 | 0.0654 | 0      | I   | 0.5624 | 0.0020 | 0.3545 | 0.0660 | 0      | I   |
| Sichuan       | 0.2350 | 0.0967 | 0.0689 | 0.2225 | 0.0005 | I   | 0.2723 | 0.3157 | 0.0718 | 0.2257 | 0.0005 | II  |
| Guizhou       | 0.2279 | 0.1374 | 0.0056 | 0.2663 | 0.0026 | IV  | 0.2131 | 0.1433 | 0.0056 | 0.2633 | 0.0026 | IV  |
| Yunnan        | 0.1569 | 0.0106 | 0.0761 | 0.2929 | 0.0026 | IV  | 0.1362 | 0.0106 | 0.0761 | 0.3048 | 0.0026 | IV  |
| Shaanxi       | 0.0089 | 0.3729 | 0.1880 | 0.5188 | 0.0132 | IV  | 0.0036 | 0.1953 | 0.4929 | 0.5603 | 0.0162 | IV  |
| Gansu         | 0      | 0      | 0.1823 | 0.5606 | 0.0740 | IV  | 0      | 0      | 0.1823 | 0.4837 | 0.1006 | IV  |
| Qinghai       | 0.0089 | 0.0512 | 0.1623 | 0.7026 | 0.0089 | IV  | 0      | 0.0600 | 0.2038 | 0.7351 | 0.0089 | IV  |
| NeiMonggol    | 0.0051 | 0.2110 | 0.1450 | 0.2932 | 0.1806 | IV  | 0.0051 | 0.2110 | 0.1450 | 0.2547 | 0.2279 | IV  |
| Guangxi       | 0.3552 | 0.1054 | 0.0975 | 0.0560 | 0      | I   | 0.3256 | 0.1054 | 0.0975 | 0.0679 | 0      | I   |
| Xizang        | 0.3063 | 0.0643 | 0.1899 | 0.1411 | 0      | I   | 0.3063 | 0.0643 | 0.0626 | 0.2358 | 0      | I   |
| Ningxia       | 0.0308 | 0      | 0.0003 | 0.3232 | 0.2842 | IV  | 0.0308 | 0      | 0.0003 | 0.2522 | 0.2842 | V   |
| Xinjiang      | 0.2629 | 0.2102 | 0.1421 | 0.3582 | 0.1158 | IV  | 0.2659 | 0.1450 | 0.0858 | 0.3049 | 0.1336 | IV  |

|               | P = 75% |        |        |        |        | Result | P = 95% |        |        |        |        | Result |
|---------------|---------|--------|--------|--------|--------|--------|---------|--------|--------|--------|--------|--------|
|               | U (1)   | U (2)  | U (3)  | U (4)  | U (5)  |        | U (1)   | U (2)  | U (3)  | U (4)  | U (5)  |        |
| Beijing       | 0.0921  | 0.0196 | 0.0296 | 0.5619 | 0.1861 | IV     | 0.0921  | 0.0196 | 0      | 0.5796 | 0.1772 | IV     |
| Tianjin       | 0.1012  | 0.0166 | 0.0385 | 0.3595 | 0.2782 | IV     | 0.1012  | 0.0166 | 0.0030 | 0.3832 | 0.3670 | IV     |
| Shanghai      | 0.0521  | 0.2390 | 0.2006 | 0.2158 | 0      | II     | 0.0284  | 0.4758 | 0.2450 | 0.2662 | 0      | II     |
| Chongqing     | 0.2775  | 0.1366 | 0.0002 | 0.2489 | 0.0051 | I      | 0.1705  | 0.3498 | 0.0002 | 0.2514 | 0.0051 | II     |
| Hebei         | 0       | 0.1178 | 0.0342 | 0.4927 | 0.2581 | IV     | 0       | 0.1178 | 0.0164 | 0.5282 | 0.2818 | IV     |
| Shanxi        | 0       | 0.0544 | 0.0301 | 0.5324 | 0.2370 | IV     | 0       | 0.0544 | 0.0242 | 0.4258 | 0.3170 | IV     |
| Liaoning      | 0       | 0.1314 | 0.2450 | 0.5475 | 0.0521 | IV     | 0       | 0.1314 | 0.0703 | 0.5919 | 0.0462 | IV     |
| Jilin         | 0.0015  | 0.0815 | 0.5918 | 0.5224 | 0      | III    | 0.0089  | 0.0578 | 0.4438 | 0.5224 | 0.0030 | IV     |
| Hei-longjiang | 0.1085  | 0.0089 | 0.0681 | 0.6790 | 0.0089 | IV     | 0.1079  | 0      | 0.0059 | 0.6790 | 0.0326 | IV     |
| Jiangsu       | 0.0114  | 0.5224 | 0.0599 | 0.2960 | 0.0148 | IV     | 0.0081  | 0.5135 | 0.0540 | 0.2131 | 0.0178 | II     |
| Zhejiang      | 0.4531  | 0.1238 | 0.0030 | 0.2570 | 0.0026 | I      | 0.2991  | 0.1238 | 0.0030 | 0.2659 | 0.0026 | I      |
| Anhui         | 0.0444  | 0.1100 | 0.4600 | 0.1564 | 0      | III    | 0.0207  | 0.3586 | 0.3504 | 0.1712 | 0      | II     |
| Fujian        | 0.4144  | 0.1087 | 0.1735 | 0.1002 | 0      | I      | 0.1924  | 0.1087 | 0.1735 | 0.1121 | 0      | I      |
| Jiangxi       | 0.3552  | 0.0771 | 0.2032 | 0.0056 | 0      | I      | 0.1598  | 0.0771 | 0.2032 | 0.0796 | 0      | III    |
| Shandong      | 0.0272  | 0.0770 | 0.2723 | 0.3701 | 0.0993 | IV     | 0.0272  | 0.0770 | 0.0562 | 0.4323 | 0.2177 | IV     |
| Henan         | 0       | 0.1478 | 0.2842 | 0.3919 | 0.0724 | IV     | 0       | 0.1389 | 0.2191 | 0.4097 | 0.1524 | IV     |

|            |        |        |        |        |        |     |        |        |        |        |        |     |
|------------|--------|--------|--------|--------|--------|-----|--------|--------|--------|--------|--------|-----|
| Hubei      | 0.0503 | 0.0889 | 0.2607 | 0.1101 | 0      | III | 0.0207 | 0.3642 | 0.2696 | 0.1901 | 0      | II  |
| Hunan      | 0.3445 | 0.0056 | 0.3392 | 0.0565 | 0      | I   | 0.2664 | 0.0086 | 0.3492 | 0.0684 | 0      | III |
| Guangdong  | 0.5077 | 0.1465 | 0.0339 | 0.2107 | 0.0003 | I   | 0.3064 | 0.1465 | 0.0339 | 0.2285 | 0.0003 | I   |
| Hainan     | 0.4588 | 0.0020 | 0.3545 | 0.0643 | 0      | I   | 0.1717 | 0.0198 | 0.3545 | 0.0761 | 0      | III |
| Sichuan    | 0.2960 | 0.1411 | 0.1458 | 0.2266 | 0.0005 | III | 0.2960 | 0.0227 | 0.3323 | 0.2946 | 0.0005 | III |
| Guizhou    | 0.1480 | 0.2173 | 0.0056 | 0.2752 | 0.0026 | IV  | 0.1154 | 0.4275 | 0.0115 | 0.2752 | 0.0026 | II  |
| Yunnan     | 0.0681 | 0.0195 | 0.0761 | 0.3136 | 0.0026 | IV  | 0.0414 | 0.2000 | 0.0761 | 0.3373 | 0.0026 | IV  |
| Shaanxi    | 0.0033 | 0.1716 | 0.2768 | 0.6639 | 0.0192 | IV  | 0.0039 | 0.2338 | 0.1288 | 0.8059 | 0.0162 | IV  |
| Gansu      | 0      | 0      | 0.1823 | 0.4541 | 0.1006 | IV  | 0      | 0      | 0.1823 | 0.4126 | 0.1510 | IV  |
| Qinghai    | 0      | 0.0748 | 0.2245 | 0.7144 | 0.0266 | IV  | 0.0030 | 0.1903 | 0.2689 | 0.6523 | 0.0296 | IV  |
| NeiMonggol | 0.0051 | 0.2110 | 0.1450 | 0.1837 | 0.2338 | V   | 0.0051 | 0.2110 | 0.1450 | 0.1866 | 0.2605 | V   |
| Guangxi    | 0.2250 | 0.1054 | 0.0975 | 0.0501 | 0      | I   | 0.1273 | 0.1054 | 0.0975 | 0.0442 | 0      | I   |
| Xizang     | 0.3093 | 0.0643 | 0.0123 | 0.3028 | 0      | I   | 0.3063 | 0.0643 | 0.0005 | 0.2891 | 0.0118 | I   |
| Ningxia    | 0.0308 | 0      | 0.0003 | 0.2048 | 0.3049 | V   | 0.0308 | 0      | 0.0003 | 0.1427 | 0.3552 | V   |
| Xinjiang   | 0.2600 | 0.0651 | 0.1391 | 0.3197 | 0.1543 | IV  | 0.2629 | 0.2190 | 0.2013 | 0.3078 | 0.1750 | IV  |

Table S6. Assessment results of energy security risk degree.

| Regions      | <i>U</i> (1) | <i>U</i> (2) | <i>U</i> (3) | <i>U</i> (4) | <i>U</i> (5) | Result |
|--------------|--------------|--------------|--------------|--------------|--------------|--------|
| Beijing      | 0.3000       | 0            | 0            | 0            | 0.5520       | V      |
| Tianjin      | 0.0030       | 0            | 0.3062       | 0            | 0.2310       | III    |
| Shanghai     | 0.0839       | 0            | 0            | 0            | 0.5520       | V      |
| Chongqing    | 0.0030       | 0.3454       | 0            | 0.0770       | 0            | II     |
| Hebei        | 0            | 0            | 0.0493       | 0.0013       | 0.1540       | V      |
| Shanxi       | 0.4457       | 0            | 0.0150       | 0            | 0.1480       | I      |
| Liaoning     | 0.3531       | 0            | 0            | 0            | 0.1288       | I      |
| Jilin        | 0.2310       | 0.0770       | 0.3000       | 0.0161       | 0            | I      |
| Heilongjiang | 0.2850       | 0.1477       | 0            | 0            | 0.1480       | I      |
| Jiangsu      | 0.0252       | 0            | 0.0930       | 0            | 0.4974       | V      |
| Zhejiang     | 0            | 0.1480       | 0.2820       | 0            | 0.5520       | V      |
| Anhui        | 0.0030       | 0.3146       | 0.0060       | 0.0370       | 0            | II     |
| Fujian       | 0.0129       | 0            | 0.1980       | 0            | 0.2022       | V      |
| Jiangxi      | 0.0462       | 0            | 0.3086       | 0.0032       | 0.0225       | III    |
| Shandong     | 0.3210       | 0            | 0.3000       | 0.0104       | 0.2310       | I      |
| Henan        | 0            | 0.0840       | 0.1022       | 0            | 0.2310       | V      |
| Hubei        | 0.0137       | 0.0210       | 0            | 0            | 0.3210       | V      |
| Hunan        | 0.0129       | 0.1890       | 0            | 0.0032       | 0.0225       | II     |
| Guangdong    | 0.0163       | 0.0360       | 0.0835       | 0            | 0.2310       | V      |
| Hainan       | 0.3462       | 0.1480       | 0            | 0            | 0.1605       | I      |
| Sichuan      | 0.2440       | 0.0060       | 0.2340       | 0.0355       | 0            | I      |
| Guizhou      | 0.5220       | 0.1860       | 0            | 0            | 0.1480       | I      |
| Yunnan       | 0.2340       | 0.0360       | 0            | 0.1412       | 0.0089       | I      |
| Shaanxi      | 0.5474       | 0            | 0            | 0.0873       | 0.0120       | I      |
| Gansu        | 0.2880       | 0            | 0            | 0.2921       | 0.1480       | IV     |
| Qinghai      | 0.2310       | 0.0030       | 0            | 0.2119       | 0.2315       | V      |
| NeiMonggol   | 0.5520       | 0            | 0            | 0            | 0.1630       | I      |
| Guangxi      | 0.1894       | 0.0992       | 0.2490       | 0            | 0.3210       | V      |
| Ningxia      | 0.2310       | 0            | 0.1003       | 0            | 0.1480       | I      |
| Xinjiang     | 0.5820       | 0            | 0            | 0            | 0            | I      |

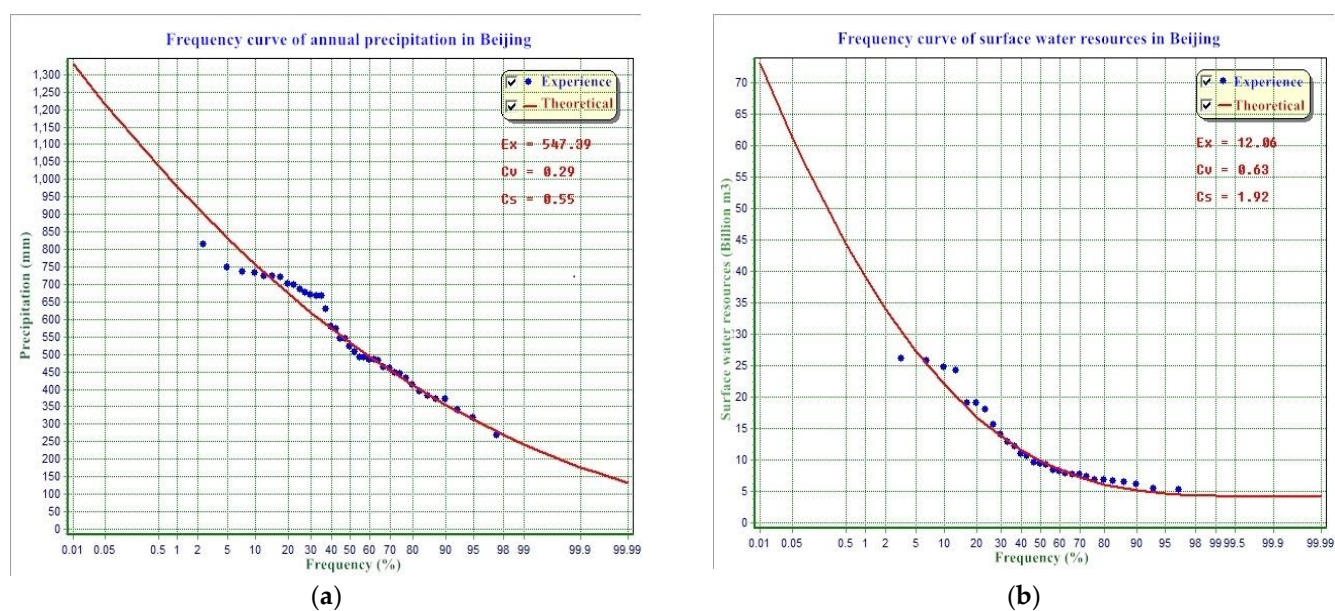

Figure S1. Frequency curve for (a) annual precipitation in Beijing; (b) surface water resources in Beijing

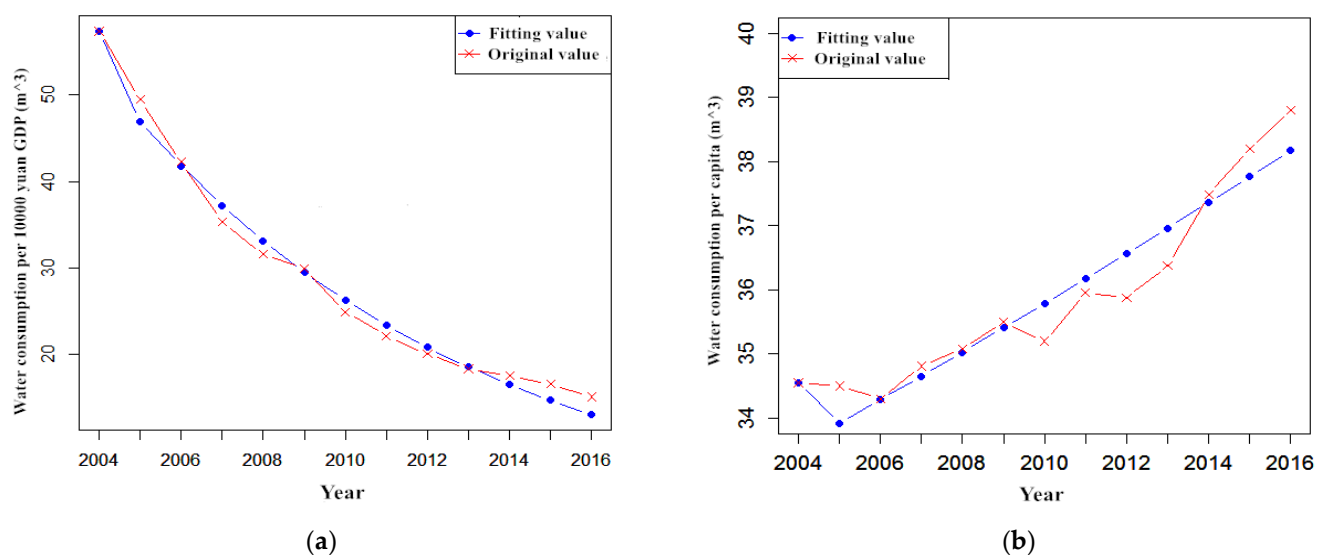

Figure S2. Comparison between the original value and the fitted value for (a) Water consumption per 10000-yuan GDP; (b) Water consumption per capita

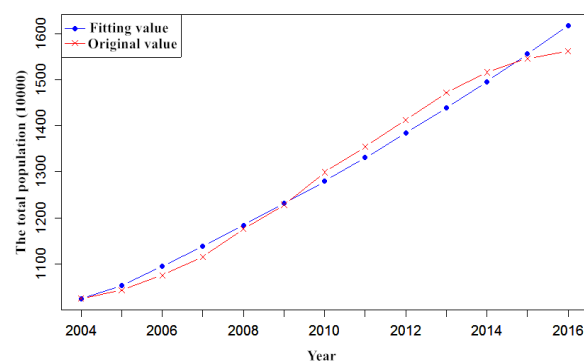

Figure S3. Comparison of the original and fitted values for population in Tianjin.

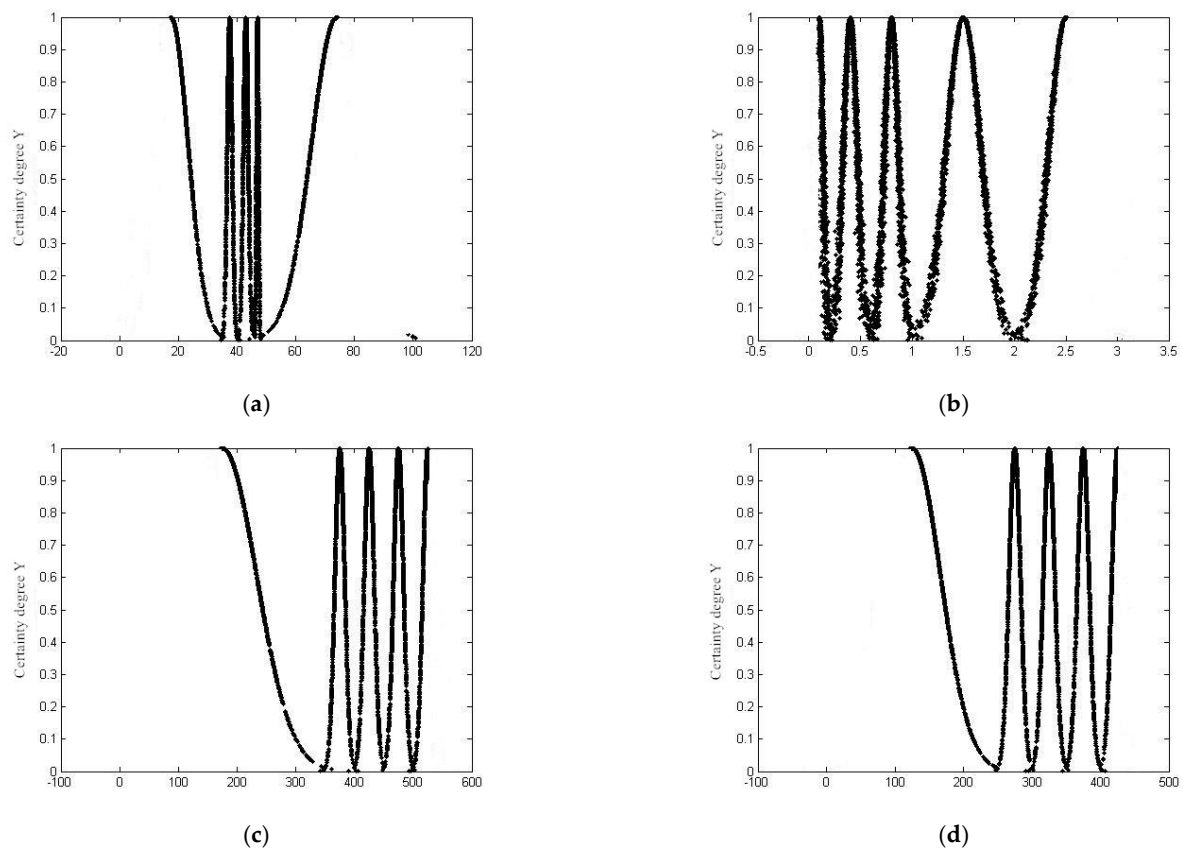

**Figure S4.** Cloud model of energy security belonging to risk level for (a) Proportion of secondary industry (on X-axis); (b) Energy reserve rate (on X-axis); (c) Energy consumption per 10000-yuan GDP (on X-axis); (d) Population density (on X-axis).
